# Supplementary material for: Are children with prolonged fever at a higher risk for serious illness? A prospective observational study
Source: HighWire-hosted journal article supplement (doi:10.1136/archdischild-2023-325343), 2023-04-25
Supplement: archdischild-2023-325343supp002_data_supplement.pdf [file archdischild-2023-325343supp002_data_supplement.pdf]

## Supplemental file 2. Algorithm for classifying children at risk of serious infection

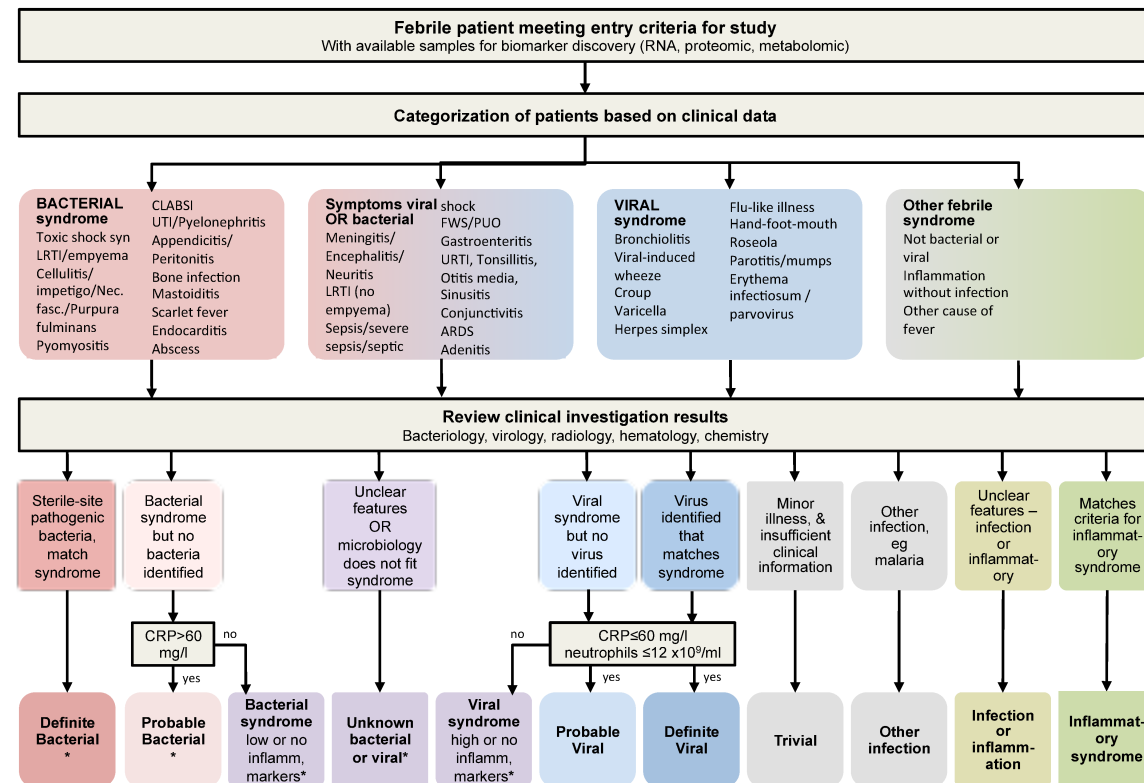

\*DB/PB/unknown bacterial or viral: patients CAN have identified viral co-infection

**Legend:**

Following discharge, clinical phenotypes were assigned after review of all available clinical and laboratory data including biochemistry, haematology, radiology and microbiology. CRP C-reactive protein
