# Supplementary material for: Are children with prolonged fever at a higher risk for serious illness? A prospective observational study
Source: HighWire-hosted journal article supplement (doi:10.1136/archdischild-2023-325343), 2023-04-25

Supplemental file 3. Number of children with fever of five days or more as a percentage of total number of febrile children included per study site and for each study period.

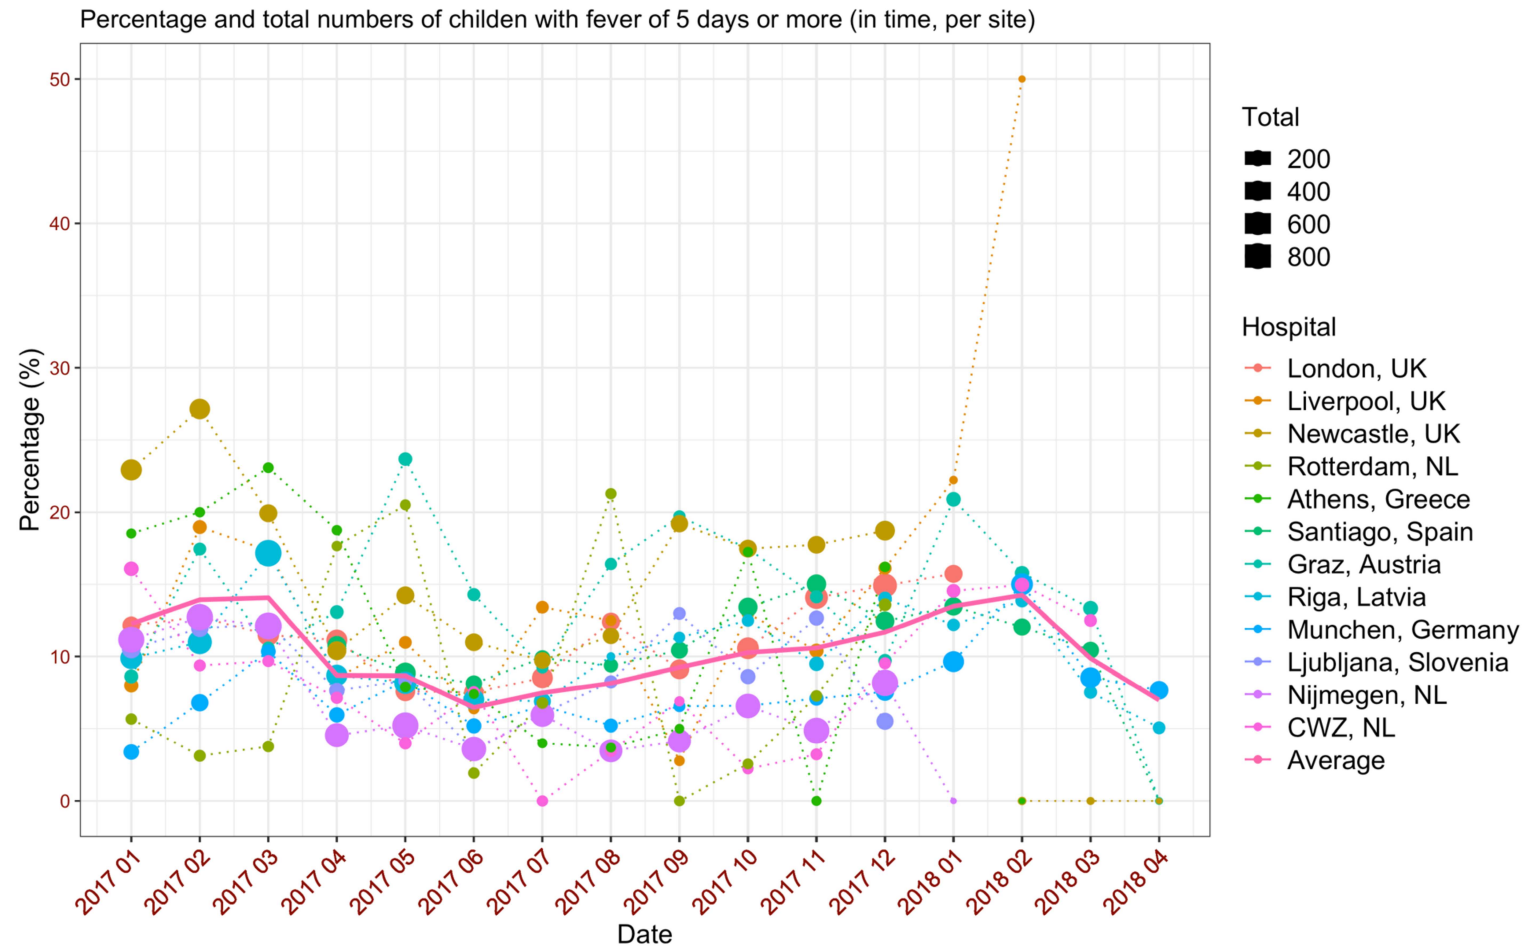

Supplement: archdischild-2023-325343supp003_data_supplement.pdf [file archdischild-2023-325343supp003_data_supplement.pdf]
