# Supplementary material for: Are children with prolonged fever at a higher risk for serious illness? A prospective observational study
Source: HighWire-hosted journal article supplement (doi:10.1136/archdischild-2023-325343), 2023-04-25
Supplement: archdischild-2023-325343supp006_data_supplement.pdf [file archdischild-2023-325343supp006_data_supplement.pdf]

## Supplemental file 6. Characteristics of all febrile children and their missing data

|                                                           |                        | All children<br>N=35,705 <sup>2</sup> | Children with fever<br>≥5 days,<br>missing data n (%) | Children with fever<br><5 days,<br>missing data n (%) |
|-----------------------------------------------------------|------------------------|---------------------------------------|-------------------------------------------------------|-------------------------------------------------------|
| <i>General characteristics</i>                            |                        |                                       |                                                       |                                                       |
| Age                                                       | Median (IQR)           | 2.74 (1.31-5.51)                      | 0 (0)                                                 | 0 (0%)                                                |
| Sex                                                       | Female, n (%)          | 16136 (45%)                           | 0 (0%)                                                | 1 (0%)                                                |
| Previous visit to any health care provider in last 7 days | N (%)                  | 8991 (26%)                            | 245 (6%)                                              | 960 (3%)                                              |
| Referral                                                  | N (%)                  | 14984 (43%)                           | 95 (3%)                                               | 988 (3%)                                              |
| Comorbidity                                               | N (%)                  | 5823 (16%)                            | 27 (1%)                                               | 226 (1%)                                              |
| Triage urgency classification                             | Emergent – Very urgent | 3431 (10%)                            | 107 (3%)                                              | 846 (3%)                                              |
|                                                           | Urgent                 | 8834 (25%)                            |                                                       |                                                       |
|                                                           | Standard – Non-urgent  | 22487 (63%)                           |                                                       |                                                       |
| Duration of fever                                         | Days, median (IQR)     | 4 (3 -5)                              | -                                                     | -                                                     |
| <i>Non-specific signs and symptoms</i>                    |                        |                                       |                                                       |                                                       |
| Respiratory signs and symptoms                            | Any                    | 11487 (38%)                           | 646 (17%)                                             | 4731 (15%)                                            |
| Gastro-intestinal signs and symptoms                      | Any                    | 10810 (34%)                           | 487 (13%)                                             | 3435 (11%)                                            |
| Other type of rash <sup>1</sup>                           | Any                    | 3285 (10%)                            | 419 (11%)                                             | 3276 (10%)                                            |
| <i>Warning signs and symptoms</i>                         |                        |                                       |                                                       |                                                       |
| Ill appearance                                            | N (%)                  | 5700 (17%)                            | 161 (4%)                                              | 1047 (3%)                                             |

|                                                 |                                               |             |            |             |
|-------------------------------------------------|-----------------------------------------------|-------------|------------|-------------|
| Tachypnoea (breaths/minute)                     | APLS thresholds, n (%)                        | 6783 (33%)  | 1759 (47%) | 13528 (42%) |
| Tachycardia (beats/minute)                      | APLS thresholds, n (%)                        | 11517 (41%) | 739 (20%)  | 7074 (22%)  |
| Prolonged capillary refill                      | >= 3 seconds, n (%)                           | 407 (1%)    | 555 (15%)  | 3466 (11%)  |
| Oxygen saturations (%O2)                        | <94% O2, n (%)                                | 762 (3%)    | 727 (19%)  | 7175 (22%)  |
| Level of consciousness                          | Decreased (Verbal, Pain, Unresponsive), n (%) | 180 (1%)    | 39 (1%)    | 236 (1%)    |
| Increased work of breathing                     | N (%)                                         | 5249 (17%)  | 620 (16%)  | 3828 (12%)  |
| Non-blanching rash                              | N (%)                                         | 1016 (3%)   | 419 (11%)  | 3276 (10%)  |
| Neurological signs                              | N (%)                                         | 234 (1%)    | 364 (10%)  | 2025 (6%)   |
| Seizures                                        | N (%)                                         | 1303 (4%)   | 205 (5%)   | 849 (3%)    |
| <i>Diagnostics</i>                              |                                               |             |            |             |
| C-reactive protein                              | mg/L, Median (IQR)                            | 18 (5 -49)  | 1626 (43%) | 17741 (56%) |
| Laboratory testing at ED                        | Any, n (%)                                    | 16612 (47%) | 0 (0%)     | 0 (0%)      |
| Imaging at ED                                   | Any, n (%)                                    | 6496 (18%)  | 0 (0%)     | 0 (0%)      |
| <i>Treatment and outcomes</i>                   |                                               |             |            |             |
| Immediate lifesaving interventions <sup>3</sup> | Any, n (%)                                    | 563 (2%)    | 0 (0%)     | 16 (0%)     |
| Antibiotics prescribed this attendance          | Any, n (%)                                    | 11417 (32%) | 62 (2%)    | 379 (1%)    |
| Diagnosis – focus of infection                  | Upper respiratory tract                       | 19018 (53%) | 16 (0%)    | 243 (1%)    |
|                                                 | Lower respiratory tract                       | 5133 (14%)  |            |             |
|                                                 | Gastro-intestinal                             | 3608 (10%)  |            |             |
|                                                 | Urinary tract                                 | 1256 (4%)   |            |             |
|                                                 | Childhood exanthema                           | 1732 (5%)   |            |             |

Disposition

|                                |             |        |         |
|--------------------------------|-------------|--------|---------|
| Soft tissue or musculoskeletal | 840 (2%)    |        |         |
| Sepsis or meningitis           | 258 (1%)    |        |         |
| Undifferentiated fever         | 2806 (8%)   |        |         |
| Inflammatory, other            | 1028 (3%)   |        |         |
| Discharge without follow-up    | 12700 (36%) | 7 (0%) | 41 (0%) |
| Discharge with follow-up       | 13698 (38%) |        |         |
| Admission <24 hours            | 1735 (5%)   |        |         |
| Admission 24 hours or more     | 6761 (19%)  |        |         |
| Admission, duration unknown    | 415 (1%)    |        |         |
| PICU or death <sup>4</sup>     | 143 (0.4%)  |        |         |
| Left without being seen        | 205 (1%)    |        |         |

<sup>1</sup> This excludes any non-blanching rash including petechiae and purpurae

<sup>2</sup> the MOFICHE study included a total of 38,480 febrile children [7]; n=2,775 (7%) were excluded because of missing data on duration of fever.

<sup>3</sup> Immediate lifesaving interventions (ILSI): airway and breathing support (non-rebreathing mask, (non-invasive)-ventilation, intubation), emergency procedures (chest needle decompression, pericardiocentesis, or open thoracotomy), haemodynamic support (fluid bolus (>10 ml/kg) or blood administration) or emergency medication (naloxone, dextrose, atropine, adenosine, epinephrine, or vasopressors)

APLS Advanced paediatric life support; CRP C-reactive protein; IQR Interquartile rang; PICU Paediatric intensive care unit; SBI Serious bacterial infection

<sup>4</sup> In total, 1 death was recorded in the MOFICHE study
